# Supplementary material
Source: PubMed Central journal article supplement (PMC154289)

**A.**

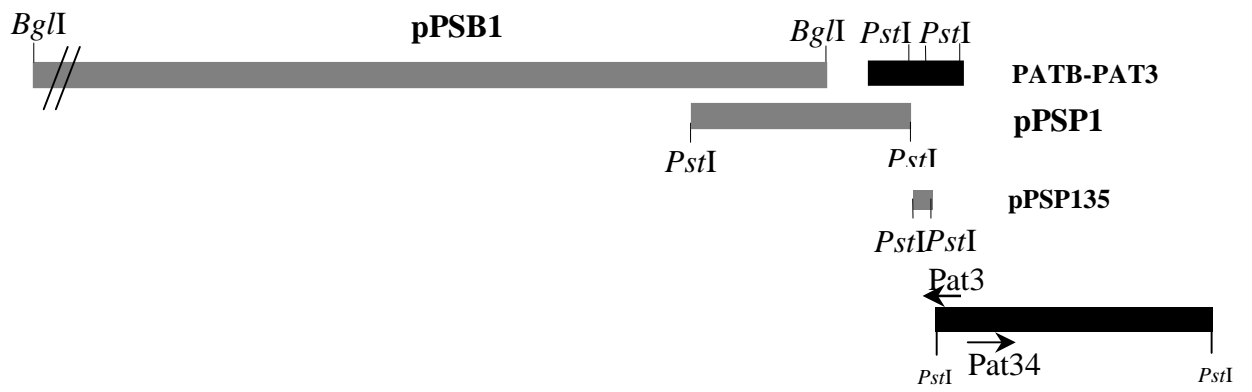

**B.**

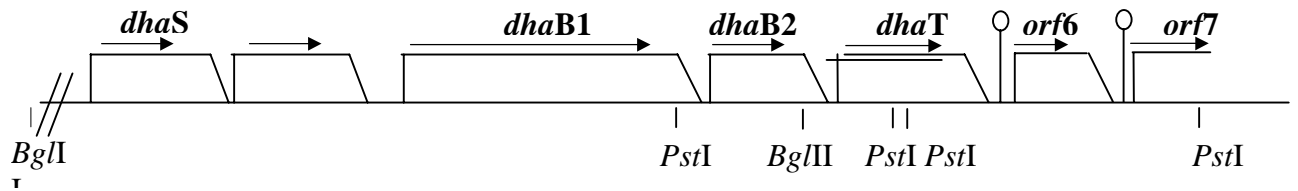

Supplement: pnas_0734105100_2.pdf [file pnas_0734105100_2.pdf]
